# Supplementary material
Source: PubMed Central journal article supplement (PMC5499360)
Supplement: jciinsight-2-92530-s001.pdf [file jciinsight-2-92530-s001.pdf]

FIGURE 6

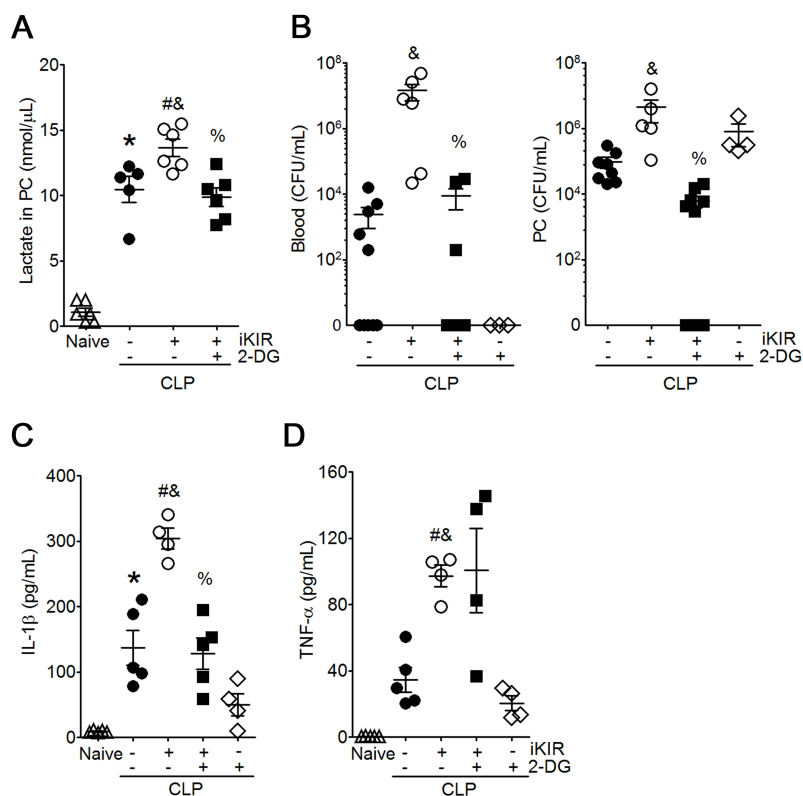

1020

1021 **FIGURE 6. Increased glycolysis is responsible for iKIR-mediated animal mortality**1022 **during sepsis.** Mice were treated with competitive hexokinase inhibitor 2-

1023 deoxyglucose (2-DG; 0.5 g/Kg, i.p.) daily for 4 days and 1 h before CLP. The animals

1024 were also treated with iKIR (inhibitor of the kinase inhibitory region), 24 h and 1 h

1025 before surgery. **(A)** Lactate levels in peritoneal exudate (n = 5-7 mice/group, one-way1026 ANOVA, followed by Bonferroni). **(B)** Bacterial loads were determined in blood and

1027 peritoneal exudate 18 h after CLP (n = 4-9 mice/group, one-way ANOVA followed by

1028 Bonferroni correction). Levels of IL-1β **(C)** and TNFα **(D)** were quantified in peritoneal

1029 exudate (n = 4-5 mice/group, one-way ANOVA, followed by Bonferroni). Scatter plot

1030 shows individual values, mean, SEM. \**P*<0.05, control-treated septic mice vs. naïve;1031 &*P*<0.05, iKIR vs. control-treated septic mice; %*P*<0.05, iKIR and 2-DG vs. iKIR-treated1032 septic mice; #*P*<0.05, iKIR-septic mice vs. naïve mice.

1033

1034

1035 **Supplementary Information**

1036

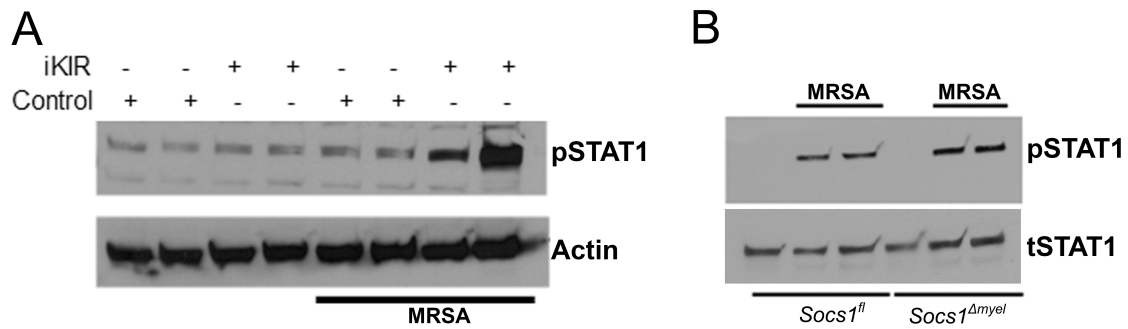

1037

1038 **Supplementary Figure 1. Validation of *Socs1*<sup>Δmyel</sup> and iKIR in macrophages. (A)**

1039 Macrophages previously treated with iKIR (inhibitor of the kinase inhibitory region) for

1040 30 min were infected with methicillin-resistant *Staphylococcus aureus* (MRSA) for 1 h,

1041 followed by detection of total and phosphorylated STAT1 by immunoblotting. (B)

1042 *Socs1*<sup>fl/fl</sup> and *Socs1*<sup>Δmyel</sup> macrophages were infected with MRSA for 1 h, and STAT1

1043 phosphorylation was detected by immunoblotting. Data are representative of two

1044 independent experiments.

1045

## SUPPLEMENTAL FIGURE 2

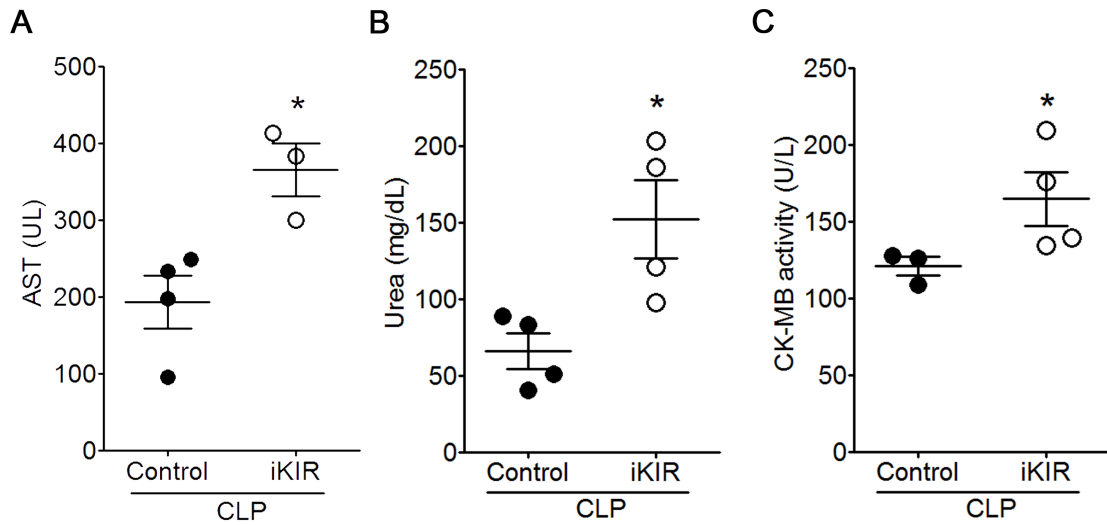

1046

1047 **Supplementary Figure 2. SOCS1 prevents organ damage during sepsis.** Levels of  
 1048 **(A)** aspartate aminotransferase (AST), **(B)** urea, and **(C)** creatine kinase-MB (CK-MB)  
 1049 were measured in serum from septic mice 18 h after cecal ligation and puncture (CLP),  
 1050 as described in the Methods. Scatter plot shows individual values, mean, SEM.  
 1051 \* $P < 0.05$ , ( $n = 3-4$  mice/group, unpaired t-test).

1052

1053

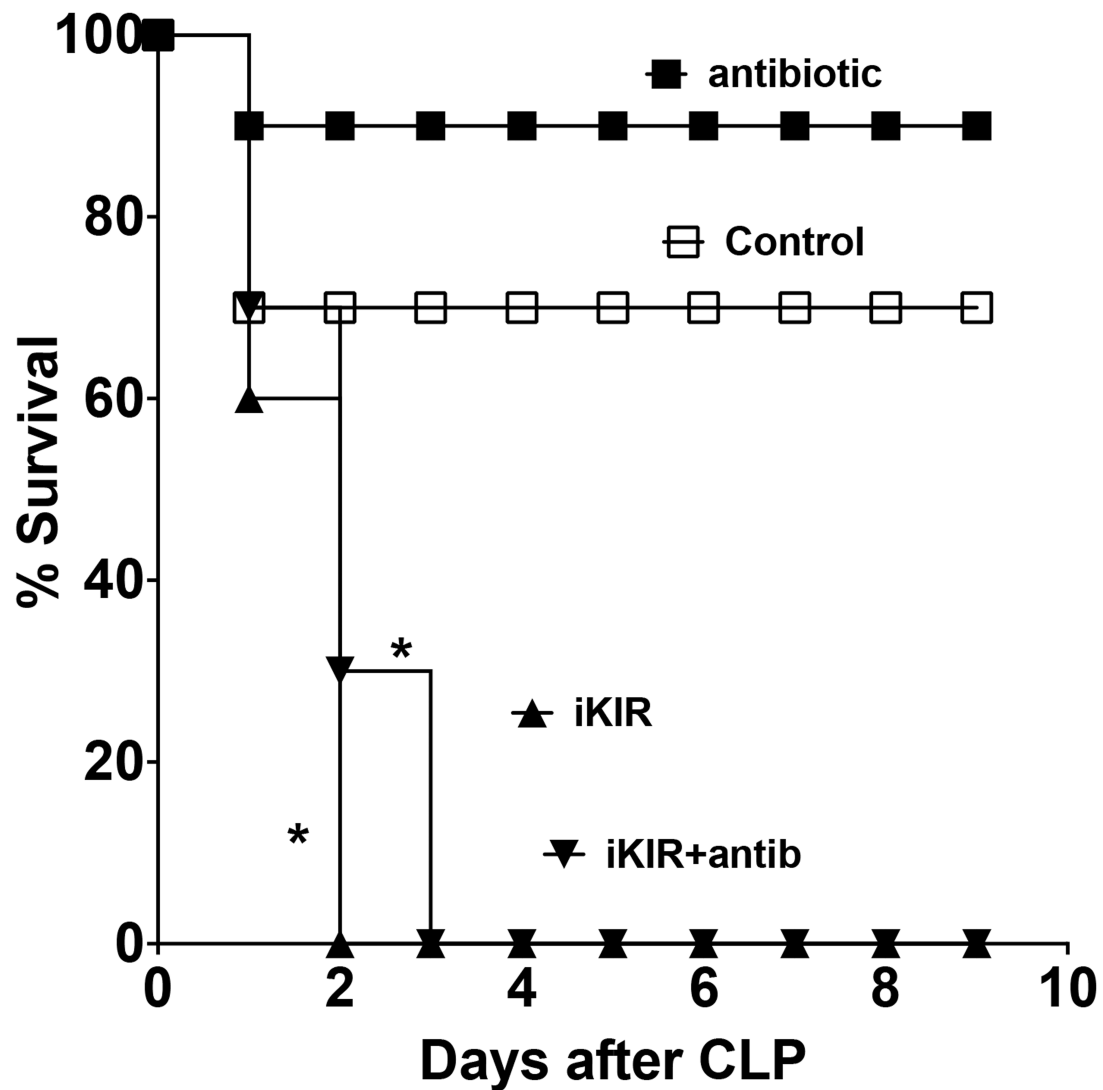

1054

1055 **Supplementary Figure 3. Antibiotic treatment does not prevent iKIR-induced**  
 1056 **animal lethality during sepsis.** Survival rates of C57BL/6 mice treated with iKIR  
 1057 (inhibitor of the kinase inhibitory region) or scrambled peptide control prior to receiving  
 1058 moderate CLP. Survival was monitored for 9 days (n = 9 mice/group, log-rank [Mantel-  
 1059 Cox] test).

1060

## SUPPLEMENTAL FIGURE 4

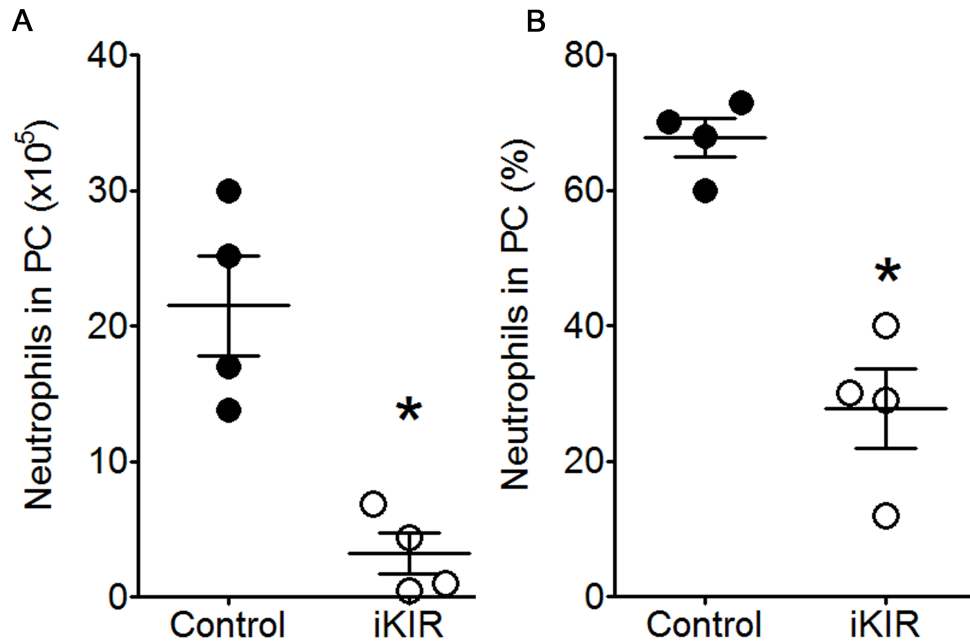

1061

1062 **Supplementary Figure 4. SOCS1 prevents neutrophil migration to the site of**1063 **infection during sepsis.** Mice previously treated with iKIR (inhibitor of the kinase1064 inhibitory region) were subjected to CLP. Number **(A)** and frequency **(B)** of neutrophils

1065 infiltrating peritoneal cavity were quantified 18 h after CLP. Scatter plot shows

1066 individual values, mean, SEM. n = 4 mice/group, unpaired t-test. \* $P < 0.05$  iKIR-treated

1067 vs. control-treated septic mice.

1068

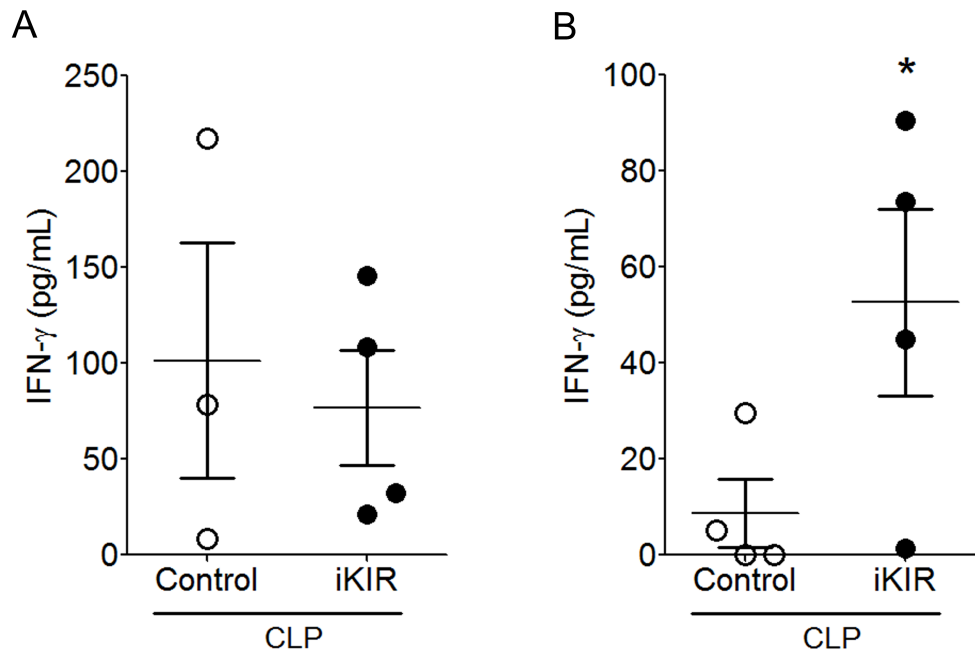

1069

1070 **Supplementary Figure 5. Pharmacological inhibition of SOCS1 increases**  
 1071 **systemic IFN $\gamma$  in septic mice.** Quantification of IFN $\gamma$  in serum (**A**) and peritoneal  
 1072 cavity (**B**) from mice treated with iKIR (inhibitor of the kinase inhibitory region) or  
 1073 control peptide. Scatter plot shows individual values, mean, SEM. \* $P < 0.05$  iKIR-treated  
 1074 septic mice vs. control-treated septic mice ( $n = 3-4$  mice/group, unpaired t-test).

1075
